# Supplementary material for: Survey of medium- and large-sized mammals in Atlantic Forest remnants of Conceição dos Ouros, Minas Gerais, Brazil
Source: Biodivers Data J. 2022 Apr 11;10:e82139. doi: 10.3897/BDJ.10.e82139 (PMC9016035; doi:10.3897/BDJ.10.e82139)
Supplement: Supplementary material 1 — Individualised records of mammals from Conceicao dos Ouros [file bdj-10-e82139-s001.xlsx]

## Sheet: Mam.Méd_Gd
Photo ID	Year	Month	Day	Time	Species	Vernacular name	N of animals	Locality	Longitude	Latitude	Altitude
7210870	2019	Jul	21	19:50:00	Didelphis sp.	Opossum	1	Torre	45°45'21.74"O	22°24'53.60"S	895
7220877	2019	Jul	22	00:27:31	Didelphis sp.	Opossum	1	Torre	45°45'21.74"O	22°24'53.60"S	895
7240881	2019	Jul	24	00:51:29	Didelphis sp.	Opossum	1	Torre	45°45'21.74"O	22°24'53.60"S	895
7240885	2019	Jul	24	04:14:51	Euphractus sexcinctus	Six-banded armadillo	1	Torre	45°45'21.74"O	22°24'53.60"S	895
7260890	2019	Jul	26	18:59:45	Didelphis sp.	Opossum	1	Torre	45°45'21.74"O	22°24'53.60"S	895
7240481	2019	Jul	24	23:45:16	Didelphis sp.	Opossum	1	Taquara	45°45'11.16"O	22°25'4.59"S	885
7250490	2019	Jul	25	09:08:48	Dicotyles tajacu	Collared peccary	20	Taquara	45°45'11.16"O	22°25'4.59"S	885
7250506	2019	Jul	25	11:24:47	Dicotyles tajacu	Collared peccary	17	Taquara	45°45'11.16"O	22°25'4.59"S	885
7250522	2019	Jul	25	20:59:30	Didelphis sp.	Opossum	1	Taquara	45°45'11.16"O	22°25'4.59"S	885
7290549	2019	Jul	29	07:07:50	Leopardus guttulus	Southern tigrina	1	Taquara	45°45'11.16"O	22°25'4.59"S	885
7290551	2019	Jul	29	10:16:47	Herpailurus yagouaroundi	Jaguarundi	1	Taquara	45°45'11.16"O	22°25'4.59"S	885
7310573	2019	Jul	31	01:23:08	Didelphis sp.	Opossum	1	Taquara	45°45'11.16"O	22°25'4.59"S	885
8030585	2019	Aug	3	00:28:14	Didelphis sp.	Opossum	1	Taquara	45°45'11.16"O	22°25'4.59"S	885
8030589	2019	Aug	3	06:49:43	Coendou spinosus	Paraguayan hairy dwarf porcupine	1	Taquara	45°45'11.16"O	22°25'4.59"S	885
8050605	2019	Aug	5	23:39:59	Didelphis sp.	Opossum	1	Taquara	45°45'11.16"O	22°25'4.59"S	885
8080629	2019	Aug	8	19:37:28	Didelphis sp.	Opossum	1	Taquara	45°45'11.16"O	22°25'4.59"S	885
8090633	2019	Aug	9	03:57:24	Euphractus sexcinctus	Six-banded armadillo	1	Taquara	45°45'11.16"O	22°25'4.59"S	885
8110649	2019	Aug	11	22:46:19	Didelphis sp.	Opossum	1	Taquara	45°45'11.16"O	22°25'4.59"S	885
8140657	2019	Aug	14	02:04:29	Leopardus guttulus	Southern tigrina	1	Taquara	45°45'11.16"O	22°25'4.59"S	885
8140661	2019	Aug	14	19:33:40	Didelphis sp.	Opossum	1	Taquara	45°45'11.16"O	22°25'4.59"S	885
8250670	2019	Aug	25	10:25:02	Dicotyles tajacu	Collared peccary	5	Taquara	45°45'11.16"O	22°25'4.59"S	885
8270707	2019	Aug	27	11:28:18	Dicotyles tajacu	Collared peccary	1	Taquara	45°45'11.16"O	22°25'4.59"S	885
8290713	2019	Aug	29	21:15:47	Dasypus novemcinctus	Nine-banded armadillo	1	Taquara	45°45'11.16"O	22°25'4.59"S	885
9010723	2019	Sep	1	08:44:02	Dicotyles tajacu	Collared peccary	1	Taquara	45°45'11.16"O	22°25'4.59"S	885
9070810	2019	Sep	7	09:15:07	Dicotyles tajacu	Collared peccary	9	Taquara	45°45'11.16"O	22°25'4.59"S	885
9070834	2019	Sep	7	14:08:06	Dicotyles tajacu	Collared peccary	9	Taquara	45°45'11.16"O	22°25'4.59"S	885
9090853	2019	Sep	9	04:07:10	Euphractus sexcinctus	Six-banded armadillo	1	Taquara	45°45'11.16"O	22°25'4.59"S	885
9150871	2019	Sep	15	11:18:29	Leopardus guttulus	Southern tigrina	1	Taquara	45°45'11.16"O	22°25'4.59"S	885
9210907	2019	Sep	21	13:48:31	Eira barbara	Tayra	1	Taquara	45°45'11.16"O	22°25'4.59"S	885
11130032	2019	Nov	13	20:35:03	Dicotyles tajacu	Collared peccary	4	Taquara	45°45'11.16"O	22°25'4.59"S	885
2180001	2020	Feb	18	10:43:28	Dicotyles tajacu	Collared peccary	1	Taquara	45°45'11.16"O	22°25'4.59"S	885
2230038	2020	Feb	23	22:19:07	Dicotyles tajacu	Collared peccary	1	Taquara	45°45'11.16"O	22°25'4.59"S	885
2270054	2020	Feb	27	14:54:27	Leopardus guttulus	Southern tigrina	1	Taquara	45°45'11.16"O	22°25'4.59"S	885
2280061	2020	Feb	28	08:47:42	Eira barbara	Tayra	1	Taquara	45°45'11.16"O	22°25'4.59"S	885
3030089	2020	Mar	3	10:59:16	Nasua nasua	Coati	1	Taquara	45°45'11.16"O	22°25'4.59"S	885
3080223	2020	Mar	8	15:17:01	Dicotyles tajacu	Collared peccary	3	Taquara	45°45'11.16"O	22°25'4.59"S	885
3100241	2020	Mar	10	02:20:01	Didelphis sp.	Opossum	1	Taquara	45°45'11.16"O	22°25'4.59"S	885
3110260	2020	Mar	11	02:58:50	Didelphis sp.	Opossum	1	Taquara	45°45'11.16"O	22°25'4.59"S	885
3120279	2020	Mar	12	21:49:55	Didelphis sp.	Opossum	1	Taquara	45°45'11.16"O	22°25'4.59"S	885
10100982	2020	Oct	10	05:28:00	Dicotyles tajacu	Collared peccary	1	Taquara	45°45'11.16"O	22°25'4.59"S	885
10110999	2020	Oct	11	23:33:06	Dicotyles tajacu	Collared peccary	1	Taquara	45°45'11.16"O	22°25'4.59"S	885
10170012	2020	Oct	17	05:39:57	Dicotyles tajacu	Collared peccary	1	Taquara	45°45'11.16"O	22°25'4.59"S	885
7180922	2019	Jul	18	07:08:37	Cerdocyon thous	Crab-eating fox	1	Jeqitibá	45°46'19.27"O	22°24'40.30"S	961
12190526	2019	Dec	19	20:46:44	Cuniculus paca	Lowland paca	1	Jeqitibá	45°46'19.27"O	22°24'40.30"S	961
1090549	2020	Jan	9	04:01:45	Cuniculus paca	Lowland paca	1	Jequitibá	45°46'19.27"O	22°24'40.30"S	961
2080637	2020	Feb	8	10:07:03	Eira barbara	Tayra	1	Jequitibá	45°46'19.27"O	22°24'40.30"S	961
2130646	2020	Feb	13	08:57:24	Nasua nasua	Coati	15	Jequitibá	45°46'19.27"O	22°24'40.30"S	961
5150004	2020	May	15	06:40:19	Leopardus pardalis	Ocelot	1	Jequitibá	45°46'19.27"O	22°24'40.30"S	961
5210051	2020	May	21	04:55:39	Didelphis sp.	Opossum	1	Jequitibá	45°46'19.27"O	22°24'40.30"S	961
6300123	2020	Jun	30	17:21:26	Nasua nasua	Coati	4	Jequitibá	45°46'19.27"O	22°24'40.30"S	961
6300142	2020	Jun	30	18:02:27	Nasua nasua	Coati	1	Jequitibá	45°46'19.27"O	22°24'40.30"S	961
7060165	2020	Jul	6	16:18:02	Dicotyles tajacu	Collared peccary	1	Jequitibá	45°46'19.27"O	22°24'40.30"S	961
7150194	2020	Jul	15	14:43:11	Nasua nasua	Coati	2	Jequitibá	45°46'19.27"O	22°24'40.30"S	961
7160202	2020	Jul	16	03:15:41	Didelphis sp.	Opossum	1	Jequitibá	45°46'19.27"O	22°24'40.30"S	961
7210218	2020	Jul	21	08:32:54	Mazama gouazoubira	Grey brocket	1	Jequitibá	45°46'19.27"O	22°24'40.30"S	961
8050268	2020	Aug	5	14:25:18	Nasua nasua	Coati	1	Jequitibá	45°46'19.27"O	22°24'40.30"S	961
1010350	2020	Nov	9	15:36:28	Sus scrofa	Wild pig	5	Segredo	45°43'28.88"O	22°26'12.63"S	906
1010354	2020	Nov	9	18:32:28	Sus scrofa	Wild pig	1	Segredo	45°43'28.88"O	22°26'12.63"S	906
1010364	2020	Nov	10	00:03:19	Sus scrofa	Wild pig	1	Segredo	45°43'28.88"O	22°26'12.63"S	906
1010386	2020	Nov	11	03:21:49	Sus scrofa	Wild pig	4	Segredo	45°43'28.88"O	22°26'12.63"S	906
1010401	2020	Nov	13	00:00:00	Leopardus pardalis	Ocelot	1	Segredo	45°43'28.88"O	22°26'12.63"S	906
1010416	2020	Nov	14	00:00:02	Sus scrofa	Wild pig	1	Segredo	45°43'28.88"O	22°26'12.63"S	906
1010425	2020	Nov	15	00:00:00	Dasypus novemcinctus	Nine-banded armadillo	1	Segredo	45°43'28.88"O	22°26'12.63"S	906
1010437	2020	Nov	16	00:00:00	Dicotyles tajacu	Collared peccary	1	Segredo	45°43'28.88"O	22°26'12.63"S	906
1010440	2020	Nov	17	01:18:42	Dicotyles tajacu	Collared peccary	1	Segredo	45°43'28.88"O	22°26'12.63"S	906
1010453	2020	Nov	17	00:00:00	Dasypus novemcinctus	Nine-banded armadillo	1	Segredo	45°43'28.88"O	22°26'12.63"S	906
1200175	2021	Jan	20	16:21:34	Dasypus novemcinctus	Nine-banded armadillo	1	Segredo	45°43'28.88"O	22°26'12.63"S	906
1240181	2021	Jan	24	08:20:31	Canis lupus familiaris	domestic dog	1	Segredo	45°43'28.88"O	22°26'12.63"S	906
1250184	2021	Jan	25	06:20:36	Nasua nasua	Coati	4	Segredo	45°43'28.88"O	22°26'12.63"S	906
1270205	2021	Jan	27	03:38:15	Didelphis sp.	Opossum	1	Segredo	45°43'28.88"O	22°26'12.63"S	906
1290207	2021	Jan	27	10:59:15	Dasypus novemcinctus	Nine-banded armadillo	1	Segredo	45°43'28.88"O	22°26'12.63"S	906
1290212	2021	Jan	29	11:08:31	Dasypus novemcinctus	Nine-banded armadillo	1	Segredo	45°43'28.88"O	22°26'12.63"S	906
2020216	2021	Feb	2	17:40:35	Sus scrofa	Wild pig	1	Segredo	45°43'28.88"O	22°26'12.63"S	906
2080221	2021	Feb	8	16:10:10	Eira barbara	Tayra	1	Segredo	45°43'28.88"O	22°26'12.63"S	906
2280226	2021	Feb	28	18:20:40	Sus scrofa	Wild pig	1	Segredo	45°43'28.88"O	22°26'12.63"S	906
3090230	2021	Mar	9	17:03:31	Sus scrofa	Wild pig	2	Segredo	45°43'28.88"O	22°26'12.63"S	906
3120234	2021	Mar	12	07:07:16	Sus scrofa	Wild pig	1	Segredo	45°43'28.88"O	22°26'12.63"S	906
3130235	2021	Mar	13	17:30:36	Dicotyles tajacu	Collared peccary	1	Segredo	45°43'28.88"O	22°26'12.63"S	906
3140241	2021	Mar	14	22:37:32	Sus scrofa	Wild pig	1	Segredo	45°43'28.88"O	22°26'12.63"S	906
3160246	2021	Mar	16	06:44:23	Sus scrofa	Wild pig	7	Segredo	45°43'28.88"O	22°26'12.63"S	906
8310026	2019	Aug	31	01:15:55	Didelphis sp.	Opossum	1	STZ 01	45°43'34.90"O	22°28'5.65"S	958
8310058	2019	Aug	31	21:10:47	Didelphis sp.	Opossum	1	STZ 01	45°43'34.90"O	22°28'5.65"S	958
9010062	2019	Sep	1	04:36:32	Didelphis sp.	Opossum	1	STZ 01	45°43'34.90"O	22°28'5.65"S	958
9010078	2019	Sep	1	21:58:34	Didelphis sp.	Opossum	1	STZ 01	45°43'34.90"O	22°28'5.65"S	958
9020090	2019	Sep	2	23:49:42	Didelphis sp.	Opossum	1	STZ 01	45°43'34.90"O	22°28'5.65"S	958
9030102	2019	Sep	3	19:56:25	Didelphis sp.	Opossum	1	STZ 01	45°43'34.90"O	22°28'5.65"S	958
9110218	2019	Sep	11	22:10:24	Dicotyles tajacu	Collared peccary	1	STZ 01	45°43'34.90"O	22°28'5.65"S	958
9170336	2019	Sep	17	15:48:33	Eira barbara	Tayra	1	STZ 01	45°43'34.90"O	22°28'5.65"S	958
7080005	2020	Jul	8	22:29:02	Dasypus novemcinctus	Nine-banded armadillo	1	STZ 01	45°43'34.90"O	22°28'5.65"S	958
7080022	2020	Jul	8	22:29:02	Dasypus novemcinctus	Nine-banded armadillo	1	STZ 01	45°43'34.90"O	22°28'5.65"S	958
7110030	2020	Jul	11	20:26:35	Dicotyles tajacu	Collared peccary	4	STZ 01	45°43'34.90"O	22°28'5.65"S	958
7130088	2020	Jul	13	17:02:05	Sus scrofa	Wild pig	1	STZ 01	45°43'34.90"O	22°28'5.65"S	958
7140094	2020	Jul	14	15:59:48	Dicotyles tajacu	Collared peccary	1	STZ 01	45°43'34.90"O	22°28'5.65"S	958
7180106	2020	Jul	18	23:08:22	Dicotyles tajacu	Collared peccary	1	STZ 01	45°43'34.90"O	22°28'5.65"S	958
7200115	2020	Jul	20	15:25:56	Dicotyles tajacu	Collared peccary	1	STZ 01	45°43'34.90"O	22°28'5.65"S	958
7220134	2020	Jul	22	15:52:51	Sus scrofa	Wild pig	1	STZ 01	45°43'34.90"O	22°28'5.65"S	958
7220136	2020	Jul	22	16:02:33	Sus scrofa	Wild pig	1	STZ 01	45°43'34.90"O	22°28'5.65"S	958
7310147	2020	Jul	31	12:56:21	Dicotyles tajacu	Collared peccary	1	STZ 01	45°43'34.90"O	22°28'5.65"S	958
6190948	2020	Dec	25	20:59:18	Leopardus pardalis	Ocelot	1	STZ 01	45°43'34.90"O	22°28'5.65"S	958
10911	2019	Aug	31	18:11:27	Leopardus pardalis	Ocelot	1	STZ 02	45°43'42.32"O	22°28'5.78"S	966
10927	2019	Sep	4	04:32:54	Leopardus pardalis	Ocelot	1	STZ 02	45°43'42.32"O	22°28'5.78"S	966
10927	2019	Sep	4	04:32:54	Didelphis sp.	Opossum	1	STZ 02	45°43'42.32"O	22°28'5.78"S	966
5110691	2019	Sep	8	17:58:31	Nasua nasua	Coati	1	STZ 02	45°43'42.32"O	22°28'5.78"S	966
5140702	2019	Aug	12	05:28:15	Dasypus novemcinctus	Nine-banded armadillo	1	STZ 02	45°43'42.32"O	22°28'5.78"S	966
5140716	2019	Aug	12	21:34:54	Leopardus pardalis	Ocelot	1	STZ 02	45°43'42.32"O	22°28'5.78"S	966
5180724	2019	Aug	16	21:54:40	Dicotyles tajacu	Collared peccary	1	STZ 02	45°43'42.32"O	22°28'5.78"S	966
5180762	2019	Aug	16	22:07:16	Dicotyles tajacu	Collared peccary	1	STZ 02	45°43'42.32"O	22°28'5.78"S	966
5190769	2019	Aug	17	00:16:37	Dicotyles tajacu	Collared peccary	1	STZ 02	45°43'42.32"O	22°28'5.78"S	966
5190769	2019	Aug	17	09:28:43	Dicotyles tajacu	Collared peccary	1	STZ 02	45°43'42.32"O	22°28'5.78"S	966
7190588	2019	Aug	19	00:08:58	Dicotyles tajacu	Collared peccary	1	STZ 02	45°43'42.32"O	22°28'5.78"S	966
5220778	2019	Aug	20	11:13:14	Canis lupus familiaris	domestic dog	1	STZ 02	45°43'42.32"O	22°28'5.78"S	966
5240788	2019	Aug	23	01:47:23	Didelphis sp.	Opossum	1	STZ 02	45°43'42.32"O	22°28'5.78"S	966
5250799	2019	Aug	23	19:20:45	Dicotyles tajacu	Collared peccary	1	STZ 02	45°43'42.32"O	22°28'5.78"S	966
5260806	2019	Aug	24	12:39:58	Dicotyles tajacu	Collared peccary	1	STZ 02	45°43'42.32"O	22°28'5.78"S	966
5260830	2019	Aug	24	14:47:40	Dicotyles tajacu	Collared peccary	2	STZ 02	45°43'42.32"O	22°28'5.78"S	966
5260838	2019	Aug	24	15:16:46	Dicotyles tajacu	Collared peccary	1	STZ 02	45°43'42.32"O	22°28'5.78"S	966
5260846	2019	Aug	24	16:41:17	Dicotyles tajacu	Collared peccary	2	STZ 02	45°43'42.32"O	22°28'5.78"S	966
5300902	2019	Aug	28	14:00:15	Canis lupus familiaris	domestic dog	1	STZ 02	45°43'42.32"O	22°28'5.78"S	966
5310908	2019	Aug	29	21:09:34	Didelphis sp.	Opossum	1	STZ 02	45°43'42.32"O	22°28'5.78"S	966
7260608	2019	Jul	26	20:10:38	Dicotyles tajacu	Collared peccary	1	STZ 02	45°43'42.32"O	22°28'5.78"S	966
7270619	2019	Jul	27	16:40:42	Eira barbara	Tayra	1	STZ 02	45°43'42.32"O	22°28'5.78"S	966
7300633	2019	Jul	30	19:05:38	Dicotyles tajacu	Collared peccary	1	STZ 02	45°43'42.32"O	22°28'5.78"S	966
7310636	2019	Jul	31	10:13:41	Dicotyles tajacu	Collared peccary	1	STZ 02	45°43'42.32"O	22°28'5.78"S	966
7310647	2019	Jul	31	20:33:31	Didelphis sp.	Opossum	1	STZ 02	45°43'42.32"O	22°28'5.78"S	966
8020650	2019	Aug	2	14:17:52	Dicotyles tajacu	Collared peccary	1	STZ 02	45°43'42.32"O	22°28'5.78"S	966
15100677	2019	Aug	7	10:46:53	Sus scrofa	Wild pig	8	STZ 02	45°43'42.32"O	22°28'5.78"S	966
19390922	2019	Sep	3	13:43:05	Canis lupus familiaris	domestic dog	1	STZ 02	45°43'42.32"O	22°28'5.78"S	966
1010002	2019	Sep	4	11:02:00	Dicotyles tajacu	Collared peccary	2	STZ 02	45°43'42.32"O	22°28'5.78"S	966
1010006	2019	Sep	4	03:40:54	Didelphis sp.	Opossum	1	STZ 02	45°43'42.32"O	22°28'5.78"S	966
1020008	2019	Sep	5	03:07:26	Canis lupus familiaris	domestic dog	1	STZ 02	45°43'42.32"O	22°28'5.78"S	966
1020020	2019	Sep	5	03:53:10	Didelphis sp.	Opossum	1	STZ 02	45°43'42.32"O	22°28'5.78"S	966
1040025	2019	Sep	7	10:53:55	Dicotyles tajacu	Collared peccary	1	STZ 02	45°43'42.32"O	22°28'5.78"S	966
1050034	2019	Sep	8	13:16:46	Dasypus novemcinctus	Nine-banded armadillo	1	STZ 02	45°43'42.32"O	22°28'5.78"S	966
1060041	2019	Sep	9	07:34:39	Dicotyles tajacu	Collared peccary	1	STZ 02	45°43'42.32"O	22°28'5.78"S	966
1110048	2019	Sep	14	10:56:55	Dicotyles tajacu	Collared peccary	1	STZ 02	45°43'42.32"O	22°28'5.78"S	966
1110050	2019	Sep	14	14:37:30	Dasypus novemcinctus	Nine-banded armadillo	1	STZ 02	45°43'42.32"O	22°28'5.78"S	966
1150062	2019	Sep	19	09:53:03	Dicotyles tajacu	Collared peccary	2	STZ 02	45°43'42.32"O	22°28'5.78"S	966
1150066	2019	Sep	19	20:28:52	Dicotyles tajacu	Collared peccary	1	STZ 02	45°43'42.32"O	22°28'5.78"S	966
7270561	2019	Jul	27	09:18:40	Canis lupus familiaris	domestic dog	1	3J	45°44'11.16"O	22°28'40.39"S	969
7310566	2019	Jul	31	01:35:08	Didelphis sp.	Opossum	1	3J	45°44'11.16"O	22°28'40.39"S	969
8100572	2019	Aug	10	16:39:56	Canis lupus familiaris	domestic dog	2	3J	45°44'11.16"O	22°28'40.39"S	969
8110580	2019	Aug	11	15:28:13	Canis lupus familiaris	domestic dog	2	3J	45°44'11.16"O	22°28'40.39"S	969
8130592	2019	Aug	13	00:39:08	Euphractus sexcinctus	Six-banded armadillo	1	3J	45°44'11.16"O	22°28'40.39"S	969
8130599	2019	Aug	13	21:26:15	Didelphis sp.	Opossum	1	3J	45°44'11.16"O	22°28'40.39"S	969
8170607	2019	Aug	17	09:40:06	Canis lupus familiaris	domestic dog	2	3J	45°44'11.16"O	22°28'40.39"S	969
8170616	2019	Aug	17	10:20:15	Canis lupus familiaris	domestic dog	2	3J	45°44'11.16"O	22°28'40.39"S	969
8240620	2019	Aug	24	19:26:20	Bos taurus	cattle	1	3J	45°44'11.16"O	22°28'40.39"S	969
8300681	2019	Aug	30	00:07:56	Bos taurus	cattle	1	3J	45°44'11.16"O	22°28'40.39"S	969
9070724	2019	Sep	7	03:21:30	Didelphis sp.	Opossum	1	3J	45°44'11.16"O	22°28'40.39"S	969
9120737	2019	Sep	12	23:35:03	Bos taurus	cattle	1	3J	45°44'11.16"O	22°28'40.39"S	969
9120737	2019	Sep	14	23:35:03	Bos taurus	cattle	1	3J	45°44'11.16"O	22°28'40.39"S	969
9140745	2019	Sep	14	00:58:22	Bos taurus	cattle	1	3J	45°44'11.16"O	22°28'40.39"S	969
9140749	2019	Sep	14	01:01:14	Bos taurus	cattle	1	3J	45°44'11.16"O	22°28'40.39"S	969
10310671	2019	Oct	31	21:44:14	Dasypus novemcinctus	Nine-banded armadillo	1	3J	45°44'11.16"O	22°28'40.39"S	969
11060684	2019	Nov	6	00:13:57	Leopardus guttulus	Southern tigrina	1	3J	45°44'11.16"O	22°28'40.39"S	969
11060688	2019	Nov	6	05:35:49	Leopardus guttulus	Southern tigrina	1	3J	45°44'11.16"O	22°28'40.39"S	969
11070696	2019	Nov	7	20:57:39	Dasypus novemcinctus	Nine-banded armadillo	1	3J	45°44'11.16"O	22°28'40.39"S	969
11130705	2019	Nov	13	23:17:11	Dasypus novemcinctus	Nine-banded armadillo	1	3J	45°44'11.16"O	22°28'40.39"S	969
11290709	2019	Nov	29	02:24:31	Dasypus novemcinctus	Nine-banded armadillo	1	3J	45°44'11.16"O	22°28'40.39"S	969
11290717	2019	Nov	29	03:27:29	Dasypus novemcinctus	Nine-banded armadillo	1	3J	45°44'11.16"O	22°28'40.39"S	969
12120892	2019	Dec	12	13:54:21	Leopardus guttulus	Southern tigrina	1	3J	45°44'11.16"O	22°28'40.39"S	969
12150901	2019	Dec	15	13:01:05	Eira barbara	Tayra	1	3J	45°44'11.16"O	22°28'40.39"S	969
12200905	2019	Dec	20	09:02:36	Leopardus guttulus	Southern tigrina	1	3J	45°44'11.16"O	22°28'40.39"S	969
7380421	2019	Jul	18	23:18:55	Didelphis sp.	Opossum	1	Aeroporto	45°44'49.17"O	22°28'55.38"S	868
20466	2019	Jul	23	08:21:25	Canis lupus familiaris	domestic dog	1	Aeroporto	45°44'49.17"O	22°28'55.38"S	868
1060496	2019	Jul	25	08:15:18	Canis lupus familiaris	domestic dog	2	Aeroporto	45°44'49.17"O	22°28'55.38"S	868
1190577	2019	Aug	7	23:43:45	Didelphis sp.	Opossum	1	Aeroporto	45°44'49.17"O	22°28'55.38"S	868
10310463	2019	Oct	31	04:35:30	Didelphis sp.	Opossum	1	Aeroporto	45°44'49.17"O	22°28'55.38"S	868
11010467	2019	Nov	1	19:33:08	Didelphis sp.	Opossum	1	Aeroporto	45°44'49.17"O	22°28'55.38"S	868
11030477	2019	Nov	3	01:55:12	Didelphis sp.	Opossum	1	Aeroporto	45°44'49.17"O	22°28'55.38"S	868
11040487	2019	Nov	4	04:40:55	Didelphis sp.	Opossum	1	Aeroporto	45°44'49.17"O	22°28'55.38"S	868
11050499	2019	Nov	5	05:20:51	Didelphis sp.	Opossum	1	Aeroporto	45°44'49.17"O	22°28'55.38"S	868
11070512	2019	Nov	7	05:00:13	Didelphis sp.	Opossum	1	Aeroporto	45°44'49.17"O	22°28'55.38"S	868
11070522	2019	Nov	7	16:02:36	Dicotyles tajacu	Collared peccary	2	Aeroporto	45°44'49.17"O	22°28'55.38"S	868
111005030	2019	Nov	10	04:41:41	Didelphis sp.	Opossum	1	Aeroporto	45°44'49.17"O	22°28'55.38"S	868
11100535	2019	Nov	10	23:06:26	Didelphis sp.	Opossum	1	Aeroporto	45°44'49.17"O	22°28'55.38"S	868
11130555	2019	Nov	13	13:40:42	Eira barbara	Tayra	1	Aeroporto	45°44'49.17"O	22°28'55.38"S	868
11140560	2019	Nov	14	13:18:46	Leopardus guttulus	Southern tigrina	1	Aeroporto	45°44'49.17"O	22°28'55.38"S	868
11220581	2019	Nov	22	13:37:51	Dicotyles tajacu	Collared peccary	1	Aeroporto	45°44'49.17"O	22°28'55.38"S	868
11220584	2019	Nov	22	15:15:09	Dicotyles tajacu	Collared peccary	2	Aeroporto	45°44'49.17"O	22°28'55.38"S	868
11220618	2019	Nov	22	16:41:17	Dicotyles tajacu	Collared peccary	2	Aeroporto	45°44'49.17"O	22°28'55.38"S	868
11270631	2019	Nov	27	05:34:08	Eira barbara	Tayra	1	Aeroporto	45°44'49.17"O	22°28'55.38"S	868
12030643	2019	Dec	3	17:15:54	Eira barbara	Tayra	1	Aeroporto	45°44'49.17"O	22°28'55.38"S	868
12040654	2019	Dec	4	13:53:24	Dicotyles tajacu	Collared peccary	2	Aeroporto	45°44'49.17"O	22°28'55.38"S	868
12040661	2019	Dec	4	14:07:41	Dicotyles tajacu	Collared peccary	2	Aeroporto	45°44'49.17"O	22°28'55.38"S	868
12090675	2019	Dec	9	15:19:53	Eira barbara	Tayra	1	Aeroporto	45°44'49.17"O	22°28'55.38"S	868
12140689	2019	Dec	14	23:41:52	Didelphis sp.	Opossum	1	Aeroporto	45°44'49.17"O	22°28'55.38"S	868
12170704	2019	Dec	17	15:11:54	Dicotyles tajacu	Collared peccary	1	Aeroporto	45°44'49.17"O	22°28'55.38"S	868
12180716	2019	Dec	18	13:35:12	Dicotyles tajacu	Collared peccary	2	Aeroporto	45°44'49.17"O	22°28'55.38"S	868
12190721	2019	Dec	19	12:20:32	Eira barbara	Tayra	1	Aeroporto	45°44'49.17"O	22°28'55.38"S	868
1120756	2020	Jan	12	06:17:15	Sus scrofa	Wild pig	1	Aeroporto	45°44'49.17"O	22°28'55.38"S	868
2120794	2020	Feb	12	17:54:33	Dicotyles tajacu	Collared peccary	1	Aeroporto	45°44'49.17"O	22°28'55.38"S	868
2120821	2020	Feb	12	18:01:15	Dicotyles tajacu	Collared peccary	1	Aeroporto	45°44'49.17"O	22°28'55.38"S	868
2270836	2020	Feb	27	11:31:44	Dicotyles tajacu	Collared peccary	1	Aeroporto	45°44'49.17"O	22°28'55.38"S	868
3010839	2020	Mar	1	22:36:35	Didelphis sp.	Opossum	1	Aeroporto	45°44'49.17"O	22°28'55.38"S	868
3110001	2020	Mar	11	21:14:00	Didelphis sp.	Opossum	1	Aeroporto	45°44'49.17"O	22°28'55.38"S	868
3120013	2020	Mar	12	11:31:14	Eira barbara	Tayra	1	Aeroporto	45°44'49.17"O	22°28'55.38"S	868
3280023	2020	Mar	28	19:54:38	Dicotyles tajacu	Collared peccary	1	Aeroporto	45°44'49.17"O	22°28'55.38"S	868
4110047	2020	April	11	19:59:58	Dicotyles tajacu	Collared peccary	1	Aeroporto	45°44'49.17"O	22°28'55.38"S	868
7190042	2019	Jul	19	01:46:34	Didelphis sp.	Opossum	1	Beira Rio	45°45'45.02"O	22°28'2.15"S	850
7190050	2019	Jul	19	19:04:48	Didelphis sp.	Opossum	1	Beira Rio	45°45'45.02"O	22°28'2.15"S	850
7190054	2019	Jul	19	19:22:26	Didelphis sp.	Opossum	1	Beira Rio	45°45'45.02"O	22°28'2.15"S	850
7200059	2019	Jul	20	04:02:10	Leopardus guttulus	Southern tigrina	1	Beira Rio	45°45'45.02"O	22°28'2.15"S	850
7200063	2019	Jul	20	04:35:20	Didelphis sp.	Opossum	1	Beira Rio	45°45'45.02"O	22°28'2.15"S	850
7200070	2019	Jul	20	22:40:13	Didelphis sp.	Opossum	1	Beira Rio	45°45'45.02"O	22°28'2.15"S	850
7220138	2019	Jul	22	20:42:43	Didelphis sp.	Opossum	1	Beira Rio	45°45'45.02"O	22°28'2.15"S	850
7230143	2019	Jul	23	01:41:47	Didelphis sp.	Opossum	1	Beira Rio	45°45'45.02"O	22°28'2.15"S	850
7240170	2019	Jul	24	21:44:36	Didelphis sp.	Opossum	1	Beira Rio	45°45'45.02"O	22°28'2.15"S	850
7250178	2019	Jul	25	19:46:45	Didelphis sp.	Opossum	1	Beira Rio	45°45'45.02"O	22°28'2.15"S	850
7260199	2019	Jul	26	18:47:09	Didelphis sp.	Opossum	1	Beira Rio	45°45'45.02"O	22°28'2.15"S	850
7270219	2019	Jul	27	18:53:46	Didelphis sp.	Opossum	1	Beira Rio	45°45'45.02"O	22°28'2.15"S	850
7290234	2019	Jul	29	04:21:15	Didelphis sp.	Opossum	1	Beira Rio	45°45'45.02"O	22°28'2.15"S	850
7300258	2019	Jul	30	21:42:32	Didelphis sp.	Opossum	1	Beira Rio	45°45'45.02"O	22°28'2.15"S	850
7310266	2019	Jul	31	01:34:43	Didelphis sp.	Opossum	1	Beira Rio	45°45'45.02"O	22°28'2.15"S	850
7310270	2019	Jul	31	04:59:43	Didelphis sp.	Opossum	1	Beira Rio	45°45'45.02"O	22°28'2.15"S	850
8030314	2019	Aug	3	02:55:33	Didelphis sp.	Opossum	1	Beira Rio	45°45'45.02"O	22°28'2.15"S	850
8030318	2019	Aug	3	06:30:50	Didelphis sp.	Opossum	1	Beira Rio	45°45'45.02"O	22°28'2.15"S	850
8030330	2019	Aug	3	17:48:39	Didelphis sp.	Opossum	1	Beira Rio	45°45'45.02"O	22°28'2.15"S	850
8040338	2019	Aug	4	17:53:11	Didelphis sp.	Opossum	1	Beira Rio	45°45'45.02"O	22°28'2.15"S	850
8080354	2019	Aug	8	08:40:56	Leopardus guttulus	Southern tigrina	1	Beira Rio	45°45'45.02"O	22°28'2.15"S	850
8080370	2019	Aug	8	18:50:22	Didelphis sp.	Opossum	1	Beira Rio	45°45'45.02"O	22°28'2.15"S	850
8090402	2019	Aug	9	18:58:28	Didelphis sp.	Opossum	1	Beira Rio	45°45'45.02"O	22°28'2.15"S	850
8090406	2019	Aug	9	20:13:55	Didelphis sp.	Opossum	1	Beira Rio	45°45'45.02"O	22°28'2.15"S	850
8100414	2019	Aug	10	20:10:21	Didelphis sp.	Opossum	1	Beira Rio	45°45'45.02"O	22°28'2.15"S	850
8100414	2019	Aug	10	20:10:21	Didelphis sp.	Opossum	1	Beira Rio	45°45'45.02"O	22°28'2.15"S	850
8130430	2019	Aug	13	18:08:05	Didelphis sp.	Opossum	1	Beira Rio	45°45'45.02"O	22°28'2.15"S	850
8130434	2019	Aug	13	20:25:54	Didelphis sp.	Opossum	1	Beira Rio	45°45'45.02"O	22°28'2.15"S	850
8140438	2019	Aug	14	05:25:09	Didelphis sp.	Opossum	1	Beira Rio	45°45'45.02"O	22°28'2.15"S	850
8150442	2019	Aug	15	18:10:16	Didelphis sp.	Opossum	1	Beira Rio	45°45'45.02"O	22°28'2.15"S	850
8170458	2019	Aug	17	00:20:03	Didelphis sp.	Opossum	1	Beira Rio	45°45'45.02"O	22°28'2.15"S	850
8170470	2019	Aug	17	18:12:41	Didelphis sp.	Opossum	1	Beira Rio	45°45'45.02"O	22°28'2.15"S	850
8190474	2019	Aug	19	20:07:27	Didelphis sp.	Opossum	1	Beira Rio	45°45'45.02"O	22°28'2.15"S	850
8220486	2019	Aug	22	05:50:52	Didelphis sp.	Opossum	1	Beira Rio	45°45'45.02"O	22°28'2.15"S	850
8260494	2019	Aug	26	02:03:17	Didelphis sp.	Opossum	1	Beira Rio	45°45'45.02"O	22°28'2.15"S	850
9040532	2019	Sep	4	18:01:15	Didelphis sp.	Opossum	1	Beira Rio	45°45'45.02"O	22°28'2.15"S	850
9050538	2019	Sep	5	05:42:25	Didelphis sp.	Opossum	1	Beira Rio	45°45'45.02"O	22°28'2.15"S	850
9070547	2019	Sep	7	18:21:17	Didelphis sp.	Opossum	1	Beira Rio	45°45'45.02"O	22°28'2.15"S	850
9090550	2019	Sep	9	03:32:15	Leopardus guttulus	Southern tigrina	1	Beira Rio	45°45'45.02"O	22°28'2.15"S	850
9230626	2019	Sep	22	21:21:51	Didelphis sp.	Opossum	1	Beira Rio	45°45'45.02"O	22°28'2.15"S	850
9280634	2019	Sep	28	21:21:03	Didelphis sp.	Opossum	1	Beira Rio	45°45'45.02"O	22°28'2.15"S	850
10020674	2019	Oct	2	19:56:49	Didelphis sp.	Opossum	1	Beira Rio	45°45'45.02"O	22°28'2.15"S	850
10020679	2019	Oct	2	22:44:44	Hydrochoerus hydrochaeris	Capybara	1	Beira Rio	45°45'45.02"O	22°28'2.15"S	850
10040710	2019	Oct	4	19:25:01	Didelphis sp.	Opossum	1	Beira Rio	45°45'45.02"O	22°28'2.15"S	850
10060718	2019	Oct	6	18:52:45	Didelphis sp.	Opossum	1	Beira Rio	45°45'45.02"O	22°28'2.15"S	850
10070722	2019	Oct	7	18:51:31	Didelphis sp.	Opossum	1	Beira Rio	45°45'45.02"O	22°28'2.15"S	850
10080726	2019	Oct	8	02:23:25	Didelphis sp.	Opossum	1	Beira Rio	45°45'45.02"O	22°28'2.15"S	850
10080743	2019	Oct	8	23:46:08	Didelphis sp.	Opossum	1	Beira Rio	45°45'45.02"O	22°28'2.15"S	850
10090754	2019	Oct	9	23:54:08	Didelphis sp.	Opossum	1	Beira Rio	45°45'45.02"O	22°28'2.15"S	850
10140792	2019	Oct	14	09:53:06	Leopardus guttulus	Southern tigrina	1	Beira Rio	45°45'45.02"O	22°28'2.15"S	850
10140803	2019	Oct	14	18:52:26	Didelphis sp.	Opossum	1	Beira Rio	45°45'45.02"O	22°28'2.15"S	850
10150818	2019	Oct	15	18:43:14	Didelphis sp.	Opossum	1	Beira Rio	45°45'45.02"O	22°28'2.15"S	850
10150822	2019	Oct	15	22:22:09	Didelphis sp.	Opossum	1	Beira Rio	45°45'45.02"O	22°28'2.15"S	850
10250850	2019	Oct	25	20:34:59	Didelphis sp.	Opossum	1	Beira Rio	45°45'45.02"O	22°28'2.15"S	850
10260858	2019	Oct	26	19:31:26	Didelphis sp.	Opossum	1	Beira Rio	45°45'45.02"O	22°28'2.15"S	850
10260862	2019	Oct	26	20:07:33	Didelphis sp.	Opossum	1	Beira Rio	45°45'45.02"O	22°28'2.15"S	850
10270870	2019	Oct	27	04:52:09	Didelphis sp.	Opossum	1	Beira Rio	45°45'45.02"O	22°28'2.15"S	850
10270878	2019	Oct	27	21:07:53	Didelphis sp.	Opossum	1	Beira Rio	45°45'45.02"O	22°28'2.15"S	850
10290902	2019	Oct	29	00:54:11	Didelphis sp.	Opossum	1	Beira Rio	45°45'45.02"O	22°28'2.15"S	850
10300918	2019	Oct	30	01:49:19	Didelphis sp.	Opossum	1	Beira Rio	45°45'45.02"O	22°28'2.15"S	850
10300958	2019	Oct	30	20:07:05	Didelphis sp.	Opossum	1	Beira Rio	45°45'45.02"O	22°28'2.15"S	850
11040063	2019	Nov	4	15:59:27	Hydrochoerus hydrochaeris	Capybara	1	Beira Rio	45°45'45.02"O	22°28'2.15"S	850
11050106	2019	Nov	5	21:01:17	Didelphis sp.	Opossum	1	Beira Rio	45°45'45.02"O	22°28'2.15"S	850
11060459	2019	Nov	6	20:30:21	Didelphis sp.	Opossum	1	Beira Rio	45°45'45.02"O	22°28'2.15"S	850
11060463	2019	Nov	6	23:16:44	Didelphis sp.	Opossum	1	Beira Rio	45°45'45.02"O	22°28'2.15"S	850
11070467	2019	Nov	7	01:41:17	Didelphis sp.	Opossum	1	Beira Rio	45°45'45.02"O	22°28'2.15"S	850
11090743	2019	Nov	9	19:08:05	Hydrochoerus hydrochaeris	Capybara	1	Beira Rio	45°45'45.02"O	22°28'2.15"S	850
11110803	2019	Nov	11	01:39:10	Didelphis sp.	Opossum	1	Beira Rio	45°45'45.02"O	22°28'2.15"S	850
11110855	2019	Nov	11	18:49:54	Didelphis sp.	Opossum	1	Beira Rio	45°45'45.02"O	22°28'2.15"S	850
11120903	2019	Nov	12	19:29:16	Didelphis sp.	Opossum	1	Beira Rio	45°45'45.02"O	22°28'2.15"S	850
11130975	2019	Nov	13	21:54:04	Didelphis sp.	Opossum	1	Beira Rio	45°45'45.02"O	22°28'2.15"S	850
11140036	2019	Nov	14	21:55:41	Didelphis sp.	Opossum	1	Beira Rio	45°45'45.02"O	22°28'2.15"S	850
11150041	2019	Nov	15	01:57:20	Didelphis sp.	Opossum	1	Beira Rio	45°45'45.02"O	22°28'2.15"S	850
11150044	2019	Nov	15	02:10:30	Didelphis sp.	Opossum	1	Beira Rio	45°45'45.02"O	22°28'2.15"S	850
11150126	2019	Nov	15	17:56:09	Hydrochoerus hydrochaeris	Capybara	1	Beira Rio	45°45'45.02"O	22°28'2.15"S	850
11150136	2019	Nov	15	23:00:39	Didelphis sp.	Opossum	1	Beira Rio	45°45'45.02"O	22°28'2.15"S	850
11160144	2019	Nov	16	00:42:57	Didelphis sp.	Opossum	1	Beira Rio	45°45'45.02"O	22°28'2.15"S	850
11160169	2019	Nov	16	08:53:51	Herpailurus yagouaroundi	Jaguarundi	1	Beira Rio	45°45'45.02"O	22°28'2.15"S	850
11160232	2019	Nov	16	19:05:21	Didelphis sp.	Opossum	1	Beira Rio	45°45'45.02"O	22°28'2.15"S	850
11160240	2019	Nov	16	20:51:02	Didelphis sp.	Opossum	1	Beira Rio	45°45'45.02"O	22°28'2.15"S	850
11170312	2019	Nov	17	19:10:00	Didelphis sp.	Opossum	1	Beira Rio	45°45'45.02"O	22°28'2.15"S	850
11170321	2019	Nov	17	22:32:36	Didelphis sp.	Opossum	1	Beira Rio	45°45'45.02"O	22°28'2.15"S	850
11180396	2019	Nov	18	19:32:25	Didelphis sp.	Opossum	1	Beira Rio	45°45'45.02"O	22°28'2.15"S	850
11180404	2019	Nov	18	20:19:17	Didelphis sp.	Opossum	1	Beira Rio	45°45'45.02"O	22°28'2.15"S	850
11180408	2019	Nov	18	22:35:03	Didelphis sp.	Opossum	1	Beira Rio	45°45'45.02"O	22°28'2.15"S	850
11190533	2019	Nov	19	22:22:54	Didelphis sp.	Opossum	1	Beira Rio	45°45'45.02"O	22°28'2.15"S	850
11200536	2019	Nov	20	00:19:04	Didelphis sp.	Opossum	1	Beira Rio	45°45'45.02"O	22°28'2.15"S	850
11200596	2019	Nov	20	23:03:44	Didelphis sp.	Opossum	1	Beira Rio	45°45'45.02"O	22°28'2.15"S	850
11220728	2019	Nov	22	19:44:27	Didelphis sp.	Opossum	1	Beira Rio	45°45'45.02"O	22°28'2.15"S	850
11220732	2019	Nov	22	22:04:24	Didelphis sp.	Opossum	1	Beira Rio	45°45'45.02"O	22°28'2.15"S	850
11240920	2019	Nov	24	18:52:15	Didelphis sp.	Opossum	1	Beira Rio	45°45'45.02"O	22°28'2.15"S	850
11240924	2019	Nov	24	19:25:39	Didelphis sp.	Opossum	1	Beira Rio	45°45'45.02"O	22°28'2.15"S	850
11240928	2019	Nov	24	20:00:58	Didelphis sp.	Opossum	1	Beira Rio	45°45'45.02"O	22°28'2.15"S	850
11250012	2019	Nov	25	19:20:47	Didelphis sp.	Opossum	1	Beira Rio	45°45'45.02"O	22°28'2.15"S	850
11250020	2019	Nov	25	20:26:07	Didelphis sp.	Opossum	1	Beira Rio	45°45'45.02"O	22°28'2.15"S	850
11250936	2019	Nov	25	00:12:33	Sus scrofa	Wild pig	1	Beira Rio	45°45'45.02"O	22°28'2.15"S	850
11260096	2019	Nov	26	22:58:09	Didelphis sp.	Opossum	1	Beira Rio	45°45'45.02"O	22°28'2.15"S	850
11270152	2019	Nov	27	19:15:14	Didelphis sp.	Opossum	1	Beira Rio	45°45'45.02"O	22°28'2.15"S	850
3290958	2020	Mar	29	05:24:35	Didelphis sp.	Opossum	1	Amélia 01	45°43'13.17"O	22°28'28.59"S	1203
4020967	2020	April	2	06:26:55	Nasua nasua	Coati	1	Amélia 01	45°43'13.17"O	22°28'28.59"S	1203
4090992	2020	April	9	10:38:25	Herpailurus yagouaroundi	Jaguarundi	1	Amélia 01	45°43'13.17"O	22°28'28.59"S	1203
4110002	2020	April	11	20:06:00	Didelphis sp.	Opossum	1	Amélia 01	45°43'13.17"O	22°28'28.59"S	1203
4130005	2020	April	13	01:58:36	Didelphis sp.	Opossum	1	Amélia 01	45°43'13.17"O	22°28'28.59"S	1203
4140010	2020	April	14	01:10:05	Leopardus guttulus	Southern tigrina	1	Amélia 01	45°43'13.17"O	22°28'28.59"S	1203
4280017	2020	April	28	18:45:55	Didelphis sp.	Opossum	1	Amélia 01	45°43'13.17"O	22°28'28.59"S	1203
4290019	2020	April	29	18:33:14	Didelphis sp.	Opossum	1	Amélia 01	45°43'13.17"O	22°28'28.59"S	1203
5020021	2020	May	2	18:22:49	Didelphis sp.	Opossum	1	Amélia 01	45°43'13.17"O	22°28'28.59"S	1203
6140061	2020	May	25	11:03:07	Sapajus nigritus	Black capuchin	1	Amélia 01	45°43'13.17"O	22°28'28.59"S	1203
9210031	2020	Sep	21	03:53:49	Leopardus pardalis	Ocelot	1	Amélia 01	45°43'13.17"O	22°28'28.59"S	1203
10010070	2020	Oct	1	17:24:52	Herpailurus yagouaroundi	Jaguarundi	2	Amélia 01	45°43'13.17"O	22°28'28.59"S	1203
10110099	2020	Oct	11	2010-01-21	Dicotyles tajacu	Collared peccary	1	Amélia 01	45°43'13.17"O	22°28'28.59"S	1203
10150109	2020	Oct	15	06:37:51	Mazama gouazoubira	Grey brocket	1	Amélia 01	45°43'13.17"O	22°28'28.59"S	1203
9290049	2020	Mar	15	15:50:47	Eira barbara	Tayra	1	Amélia 2	45°43'13.35"O	22°28'42.72"S	1054
14020067	2020	Mar	19	08:08:02	Eira barbara	Tayra	1	Amélia 2	45°43'13.35"O	22°28'42.72"S	1054
14030075	2020	Mar	20	14:17:53	Leopardus guttulus	Southern tigrina	1	Amélia 2	45°43'13.35"O	22°28'42.72"S	1054
14040082	2020	Mar	20	19:09:03	Dicotyles tajacu	Collared peccary	6	Amélia 2	45°43'13.35"O	22°28'42.72"S	1054
14070095	2020	Mar	24	12:30:22	Eira barbara	Tayra	1	Amélia 2	45°43'13.35"O	22°28'42.72"S	1054
14110100	2020	Mar	28	14:46:07	Eira barbara	Tayra	1	Amélia 2	45°43'13.35"O	22°28'42.72"S	1054
14140116	2020	Mar	31	12:00:45	Eira barbara	Tayra	1	Amélia 2	45°43'13.35"O	22°28'42.72"S	1054
14150120	2020	April	1	12:30:32	Eira barbara	Tayra	1	Amélia 2	45°43'13.35"O	22°28'42.72"S	1054
14150131	2020	April	1	14:45:11	Nasua nasua	Coati	1	Amélia 2	45°43'13.35"O	22°28'42.72"S	1054
14160138	2020	April	2	07:11:58	Nasua nasua	Coati	1	Amélia 2	45°43'13.35"O	22°28'42.72"S	1054
14170156	2020	April	2	18:30:41	Eira barbara	Tayra	1	Amélia 2	45°43'13.35"O	22°28'42.72"S	1054
14180160	2020	April	4	07:23:36	Leopardus guttulus	Southern tigrina	1	Amélia 2	45°43'13.35"O	22°28'42.72"S	1054
14200167	2020	April	6	15:03:59	Eira barbara	Tayra	1	Amélia 2	45°43'13.35"O	22°28'42.72"S	1054
14210178	2020	April	7	11:00:04	Sapajus nigritus	Black capuchin	1	Amélia 2	45°43'13.35"O	22°28'42.72"S	1054
14230191	2020	April	9	12:16:07	Eira barbara	Tayra	1	Amélia 2	45°43'13.35"O	22°28'42.72"S	1054
14240203	2020	April	10	14:56:50	Eira barbara	Tayra	1	Amélia 2	45°43'13.35"O	22°28'42.72"S	1054
14260211	2020	April	11	15:45:33	Eira barbara	Tayra	1	Amélia 2	45°43'13.35"O	22°28'42.72"S	1054
14260215	2020	April	12	15:24:54	Eira barbara	Tayra	1	Amélia 2	45°43'13.35"O	22°28'42.72"S	1054
15010252	2020	April	18	07:47:10	Eira barbara	Tayra	1	Amélia 2	45°43'13.35"O	22°28'42.72"S	1054
15050281	2020	April	21	22:40:05	Procyon cancrivorus	Crab-eating raccoon	1	Amélia 2	45°43'13.35"O	22°28'42.72"S	1054
15100303	2020	April	27	13:24:52	Eira barbara	Tayra	1	Amélia 2	45°43'13.35"O	22°28'42.72"S	1054
15180372	2020	May	5	08:13:00	Eira barbara	Tayra	1	Amélia 2	45°43'13.35"O	22°28'42.72"S	1054
15190383	2020	May	6	12:07:39	Eira barbara	Tayra	1	Amélia 2	45°43'13.35"O	22°28'42.72"S	1054
15200387	2020	May	7	04:35:11	Eira barbara	Tayra	1	Amélia 2	45°43'13.35"O	22°28'42.72"S	1054
15220391	2020	May	9	13:13:18	Eira barbara	Tayra	1	Amélia 2	45°43'13.35"O	22°28'42.72"S	1054
15260400	2020	May	11	16:45:41	Eira barbara	Tayra	1	Amélia 2	45°43'13.35"O	22°28'42.72"S	1054
15260404	2020	May	13	03:43:12	Eira barbara	Tayra	1	Amélia 2	45°43'13.35"O	22°28'42.72"S	1054
15280407	2020	May	14	17:19:58	Eira barbara	Tayra	1	Amélia 2	45°43'13.35"O	22°28'42.72"S	1054
15280411	2020	May	15	14:01:21	Eira barbara	Tayra	1	Amélia 2	45°43'13.35"O	22°28'42.72"S	1054
15290419	2020	May	16	10:39:09	Nasua nasua	Coati	1	Amélia 2	45°43'13.35"O	22°28'42.72"S	1054
15310430	2020	May	18	09:57:07	Dicotyles tajacu	Collared peccary	1	Amélia 2	45°43'13.35"O	22°28'42.72"S	1054
16030471	2020	May	21	08:41:54	Eira barbara	Tayra	1	Amélia 2	45°43'13.35"O	22°28'42.72"S	1054
16090483	2020	May	27	12:33:55	Eira barbara	Tayra	1	Amélia 2	45°43'13.35"O	22°28'42.72"S	1054
9040051	2020	Sep	4	20:14:06	Procyon cancrivorus	Crab-eating raccoon	1	Amélia 2	45°43'13.35"O	22°28'42.72"S	1054
980057	2020	Sep	8	16:05:16	Leopardus guttulus	Southern tigrina	1	Amélia 2	45°43'13.35"O	22°28'42.72"S	1054
3190325	2021	Mar	19	18:35:00	Dicotyles tajacu	Collared peccary	1	Paineirão	45°43'25.95"O	22°27'17.92"S	1151
3210349	2021	Mar	21	19:02:00	Dicotyles tajacu	Collared peccary	1	Paineirão	45°43'25.95"O	22°27'17.92"S	1151
3220369	2021	Mar	22	16:42:19	Sus scrofa	Wild pig	2	Paineirão	45°43'25.95"O	22°27'17.92"S	1151
3220377	2021	Mar	22	17:47:40	Sus scrofa	Wild pig	1	Paineirão	45°43'25.95"O	22°27'17.92"S	1151
3220381	2021	Mar	22	20:46:07	Leopardus guttulus	Southern tigrina	1	Paineirão	45°43'25.95"O	22°27'17.92"S	1151
3230383	2021	Mar	23	14:53:51	Dicotyles tajacu	Collared peccary	1	Paineirão	45°43'25.95"O	22°27'17.92"S	1151
3250393	2021	Mar	25	11:08:51	Eira barbara	Tayra	1	Paineirão	45°43'25.95"O	22°27'17.92"S	1151
3250396	2021	Mar	25	18:19:37	Dicotyles tajacu	Collared peccary	1	Paineirão	45°43'25.95"O	22°27'17.92"S	1151
3260405	2021	Mar	26	02:13:28	Sus scrofa	Wild pig	1	Paineirão	45°43'25.95"O	22°27'17.92"S	1151
4030426	2021	April	3	16:17:43	Dicotyles tajacu	Collared peccary	1	Paineirão	45°43'25.95"O	22°27'17.92"S	1151
4050439	2021	April	5	06:55:39	Sus scrofa	Wild pig	2	Paineirão	45°43'25.95"O	22°27'17.92"S	1151
4050447	2021	April	5	17:30:13	Sus scrofa	Wild pig	1	Paineirão	45°43'25.95"O	22°27'17.92"S	1151
4050453	2021	April	5	21:39:55	Sus scrofa	Wild pig	4	Paineirão	45°43'25.95"O	22°27'17.92"S	1151
4090461	2021	April	9	23:20:47	Sus scrofa	Wild pig	1	Paineirão	45°43'25.95"O	22°27'17.92"S	1151
4150482	2021	April	15	20:10:33	Dicotyles tajacu	Collared peccary	4	Paineirão	45°43'25.95"O	22°27'17.92"S	1151
4190497	2021	April	19	01:44:22	Sus scrofa	Wild pig	1	Paineirão	45°43'25.95"O	22°27'17.92"S	1151
4210503	2021	April	21	06:50:02	Bos taurus	cattle	6	Paineirão	45°43'25.95"O	22°27'17.92"S	1151
4210521	2021	April	21	07:24:00	Bos taurus	cattle		Paineirão	45°43'25.95"O	22°27'17.92"S	1151
4210525	2021	April	21	22:23:07	Leopardus pardalis	Ocelot	1	Paineirão	45°43'25.95"O	22°27'17.92"S	1151
4260530	2021	April	26	10:55:49	Nasua nasua	Coati	1	Paineirão	45°43'25.95"O	22°27'17.92"S	1151
4280537	2021	April	28	23:06:11	Sus scrofa	Wild pig	1	Paineirão	45°43'25.95"O	22°27'17.92"S	1151
4300541	2021	April	30	00:42:44	Bos taurus	cattle	1	Paineirão	45°43'25.95"O	22°27'17.92"S	1151
4300549	2021	April	30	01:37:20	Bos taurus	cattle	1	Paineirão	45°43'25.95"O	22°27'17.92"S	1151
4300553	2021	April	30	06:46:16	Bos taurus	cattle	2	Paineirão	45°43'25.95"O	22°27'17.92"S	1151
4300561	2021	April	30	22:40:50	Bos taurus	cattle	2	Paineirão	45°43'25.95"O	22°27'17.92"S	1151
4300577	2021	April	30	23:02:36	Bos taurus	cattle	1	Paineirão	45°43'25.95"O	22°27'17.92"S	1151
5010585	2021	May	1	00:03:23	Bos taurus	cattle	1	Paineirão	45°43'25.95"O	22°27'17.92"S	1151
5010587	2021	May	1	07:34:21	Sus scrofa	Wild pig	1	Paineirão	45°43'25.95"O	22°27'17.92"S	1151
5010599	2021	May	1	08:26:51	Bos taurus	cattle	3	Paineirão	45°43'25.95"O	22°27'17.92"S	1151
5020626	2021	May	2	01:53:32	Sus scrofa	Wild pig	1	Paineirão	45°43'25.95"O	22°27'17.92"S	1551
3250111	2021	Mar	25	18:23:46	Sus scrofa	Wild pig	1	Guatambú	45°43'46.77"O	22°27'14.51"S	994
3270117	2021	Mar	27	13:02:36	Eira barbara	Tayra	1	Guatambú	45°43'46.77"O	22°27'14.51"S	994
3290125	2021	Mar	29	00:08:45	Procyon cancrivorus	Crab-eating raccoon	1	Guatambú	45°43'46.77"O	22°27'14.51"S	994
3290130	2021	Mar	29	10:42:48	Nasua nasua	Coati	16	Guatambú	45°43'46.77"O	22°27'14.51"S	994
4010132	2021	April	1	12:37:44	Sus scrofa	Wild pig	1	Guatambú	45°43'46.77"O	22°27'14.51"S	994
4010142	2021	April	1	18:51:37	Sus scrofa	Wild pig	1	Guatambú	45°43'46.77"O	22°27'14.51"S	994
4060157	2021	April	6	22:17:52	Leopardus pardalis	Ocelot	1	Guatambú	45°43'46.77"O	22°27'14.51"S	994
4070161	2021	April	7	21:37:42	Procyon cancrivorus	Crab-eating raccoon	1	Guatambú	45°43'46.77"O	22°27'14.51"S	994
4070174	2021	April	7	22:48:13	Sus scrofa	Wild pig	1	Guatambú	45°43'46.77"O	22°27'14.51"S	994
4100182	2021	April	10	19:27:51	Sus scrofa	Wild pig	1	Guatambú	45°43'46.77"O	22°27'14.51"S	994
4120198	2021	April	12	11:18:12	Nasua nasua	Coati	8	Guatambú	45°43'46.77"O	22°27'14.51"S	994
4120218	2021	April	12	16:57:45	Nasua nasua	Coati	6	Guatambú	45°43'46.77"O	22°27'14.51"S	994
4150226	2021	April	15	07:36:20	Sus scrofa	Wild pig	1	Guatambú	45°43'46.77"O	22°27'14.51"S	994
4210238	2021	April	21	00:07:17	Sus scrofa	Wild pig	1	Guatambú	45°43'46.77"O	22°27'14.51"S	994
4210149	2021	April	21	19:08:22	Leopardus pardalis	Ocelot	1	Guatambú	45°43'46.77"O	22°27'14.51"S	994
4240253	2021	April	24	02:31:20	Procyon cancrivorus	Crab-eating raccoon	1	Guatambú	45°43'46.77"O	22°27'14.51"S	994
4240257	2021	April	24	03:10:00	Procyon cancrivorus	Crab-eating-raccoon	1	Guatambú	45°43'46.77"O	22°27'14.51"S	994
1160631	2021	Jul	30	15:57:38	Puma concolor	Puma	1	Panelão 1	45°43'15.95"O	22°27'53.20"S	1082
7200029	2021	Jul	20	23:36:17	Leopardus pardalis	Ocelot	1	Panelão 2	45°43'11.43"O	22°27'51.59"S	1115
7230043	2021	Jul	23	19:38:44	Procyon cancrivorus	Crab-eating raccoon	1	Panelão 2	45°43'11.43"O	22°27'51.59"S	1115
7240052	2021	Jul	24	16:10:24	Dicotyles tajacu	Collared peccary	5	Panelão 2	45°43'11.43"O	22°27'51.59"S	1115
8030083	2021	Aug	3	20:04:29	Procyon cancrivorus	Crab-eating raccoon	1	Panelão 2	45°43'11.43"O	22°27'51.59"S	1115
8040087	2021	Aug	4	11:50:43	Canis lupus familiaris	domestic dog	1	Panelão 2	45°43'11.43"O	22°27'51.59"S	1115
8100095	2021	Aug	10	04:25:05	Procyon cancrivorus	Crab-eating raccoon	1	Panelão 2	45°43'11.43"O	22°27'51.59"S	1115
8130099	2021	Aug	13	16:45:41	Eira barbara	Tayra	1	Panelão 2	45°43'11.43"O	22°27'51.59"S	1115
8140103	2021	Aug	14	00:24:02	Leopardus pardalis	Ocelot	1	Panelão 2	45°43'11.43"O	22°27'51.59"S	1115
8160109	2021	Aug	16	14:54:07	Eira barbara	Tayra	1	Panelão 2	45°43'11.43"O	22°27'51.59"S	1115
8170118	2021	Aug	17	23:45:00	Dicotyles tajacu	Collared peccary	3	Panelão 2	45°43'11.43"O	22°27'51.59"S	1115
8220121	2021	Aug	22	16:27:36	Nasua nasua	Coati	1	Panelão 2	45°43'11.43"O	22°27'51.59"S	1115
8240126	2021	Aug	24	15:53:05	Canis lupus familiaris	domestic dog	1	Panelão 2	45°43'11.43"O	22°27'51.59"S	1115
8310137	2021	Aug	31	12:32:22	Canis lupus familiaris	domestic dog	1	Panelão 2	45°43'11.43"O	22°27'51.59"S	1115
7290272	2021	Jul	29	17:26:57	Puma concolor	Puma	1	Internato 1	45°45'24.03"O	22°28'25.41"S	865
7310276	2021	Jul	31	14:34:57	Chrysocyon brachyurus	Maned wolf	1	Internato 1	45°45'24.03"O	22°28'25.41"S	865
8010293	2021	Aug	1	12:04:29	Chrysocyon brachyurus	Maned wolf	1	Internato 1	45°45'24.03"O	22°28'25.41"S	865
8010297	2021	Aug	1	12:04:52	Canis lupus familiaris	domestic dog	1	Internato 1	45°45'24.03"O	22°28'25.41"S	865
8020301	2021	Aug	2	21:03:48	Leopardus pardalis	Ocelot	1	Internato 1	45°45'24.03"O	22°28'25.41"S	865
8120309	2021	Aug	12	01:05:39	Sus scrofa	Wild pig	1	Internato 1	45°45'24.03"O	22°28'25.41"S	865
8140317	2021	Aug	14	20:52:40	Canis lupus familiaris	domestic dog	1	Internato 1	45°45'24.03"O	22°28'25.41"S	865
8150321	2021	Aug	15	11:37:58	Sapajus nigritus	Black capuchin	3	Internato 1	45°45'24.03"O	22°28'25.41"S	865
8170327	2021	Aug	17	13:40:41	Canis lupus familiaris	domestic dog	1	Internato 1	45°45'24.03"O	22°28'25.41"S	865
8170331	2021	Aug	17	14:55:27	Canis lupus familiaris	domestic dog	1	Internato 1	45°45'24.03"O	22°28'25.41"S	865
8170341	2021	Aug	17	15:32:30	Canis lupus familiaris	domestic dog	1	Internato 1	45°45'24.03"O	22°28'25.41"S	865
8180350	2021	Aug	18	19:42:31	Sus scrofa	Wild pig	1	Internato 1	45°45'24.03"O	22°28'25.41"S	865
8240358	2021	Aug	24	00:42:56	Sus scrofa	Wild pig	6	Internato 1	45°45'24.03"O	22°28'25.41"S	865
8290370	2021	Aug	29	01:10:14	Euphractus sexcinctus	Six-banded armadillo	1	Internato 1	45°45'24.03"O	22°28'25.41"S	865
8290403	2021	Aug	29	17:12:43	Canis lupus familiaris	domestic dog	1	Internato 1	45°45'24.03"O	22°28'25.41"S	865
8290417	2021	Aug	29	21:04:20	Canis lupus familiaris	domestic dog	1	Internato 1	45°45'24.03"O	22°28'25.41"S	865
